# Supplementary material for: Low Sleep Hygiene Is Associated with Less Adherence to the Mediterranean Diet in Chilean Schoolchildren from Rural Public Schools. A Cross-Sectional Study
Source: Preprints.org preprint supplement (doi:10.20944/preprints202306.1961.v1), 2023-06-28
Supplement: Supplementary file 1 [file supplementary]

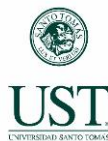

**Estimado (a) Investigador (a) Principal**

Jessica Ibarra-Mora

**Presente**

De nuestra consideración

A través de la presente carta, el Comité de Ética Científico de la macrozona centro Sur de la Universidad Santo Tomás (CEC-CS UST) informa que la resolución al proyecto de investigación titulado: *“Diagnóstico de hábitos de vida saludable en comunidades escolares de la comuna de El Carmen – Región de Ñuble”* con código n° **18-21**, corresponde a: **APROBADO**.

**Solo como sugerencia:**

- Sería aconsejable indicar en el proyecto que pasara con la comunidad educativa que no tiene conectividad

Sin otro particular y deseándole éxito en su proyecto,

Le saluda atentamente,

**Igor Cigarroa Cuevas**  
Secretario CEC-CS-UST  
Universidad Santo Tomás

Los Ángeles, 07 de abril del 2021
